# Supplementary material for: Analysis of Population Structure: A Unifying Framework and Novel Methods Based on Sparse Factor Analysis
Source: PLOS journal article supplement (doi:10.1371/journal.pgen.1001117), 2010-09-16
Supplement: S3 (10.1371/journal.pgen.1001117.s003) [file journal.pgen.1001117.s003]

# SUPPLEMENTAL INFORMATION FOR SPARSE FACTOR ANALYSIS AND POPULATION STRUCTURE

BARBARA E ENGELHARDT, MATTHEW STEPHENS

## 1. MATRIX FACTORIZATION AFTER STANDARDIZING COLUMNS OF $G$

Let's consider the difference in matrix  $G$  from standardizing each of the columns. Let  $\tau^{-1}$  be the  $p$ -vector of the column standard deviations, and  $diag(\tau)$  is the  $p \times p$  diagonal matrix of the inverse of those standard deviations.

$$(1) \quad G' = (G - \mathbf{1}_n \bar{G}^t) diag(\tau)$$

where  $\bar{G}$  is the  $p$ -vector of the column means of  $G$ , and  $G'$  is the column-standardized matrix to which we apply PCA. Then,

$$(2) \quad (G - \mathbf{1}_n \bar{G}^t) diag(\tau) = \Lambda F$$

$$(3) \quad G = \Lambda F diag(\tau^{-1}) + \mathbf{1}_n \bar{G}^t$$

$$(4) \quad = (\mathbf{1}_n \Lambda) \begin{pmatrix} \bar{G}^t \\ F diag(\tau^{-1}) \end{pmatrix}.$$

This implies that the means play the role of an additional factor that does not necessarily conform to the orthonormal constraint on  $F$ . It also implies that the  $\Lambda$  will be scaled (because the  $F$  are required to be orthonormal).
